# Supplementary material
Source: PubMed Central journal article supplement (PMC4090055)

**SUPPLEMENTARY FILE 1**

**Mono-Substituted Isopropylated Triaryl Phosphate, a Major Component of  
Firemaster 550, is an AHR Agonist that Exhibits AHR-Independent Cardiotoxicity  
in Zebrafish**

Cory V. Gerlach, Siba R. Das, David C. Volz, William H. Bisson, Siva K. Kolluri, and  
Robert L. Tanguay

**Supplemental Figure S1.** Developmental mITP exposure results in a concentration-dependent increase in PE. (A) Embryos were exposed to vehicle control (0.1% DMSO) or varying concentrations of mITP from 6 to 120 hpf. Percent PE is mean  $\pm$  SE. Asterisk (\*) denotes a statistically significant increase in PE relative to vehicle control ( $p < 0.05$ ). (B) Representative bright-field images at 120 hpf after exposure to increasing concentrations of mITP. N = 3 replicate vials and 10 fish per replicate.

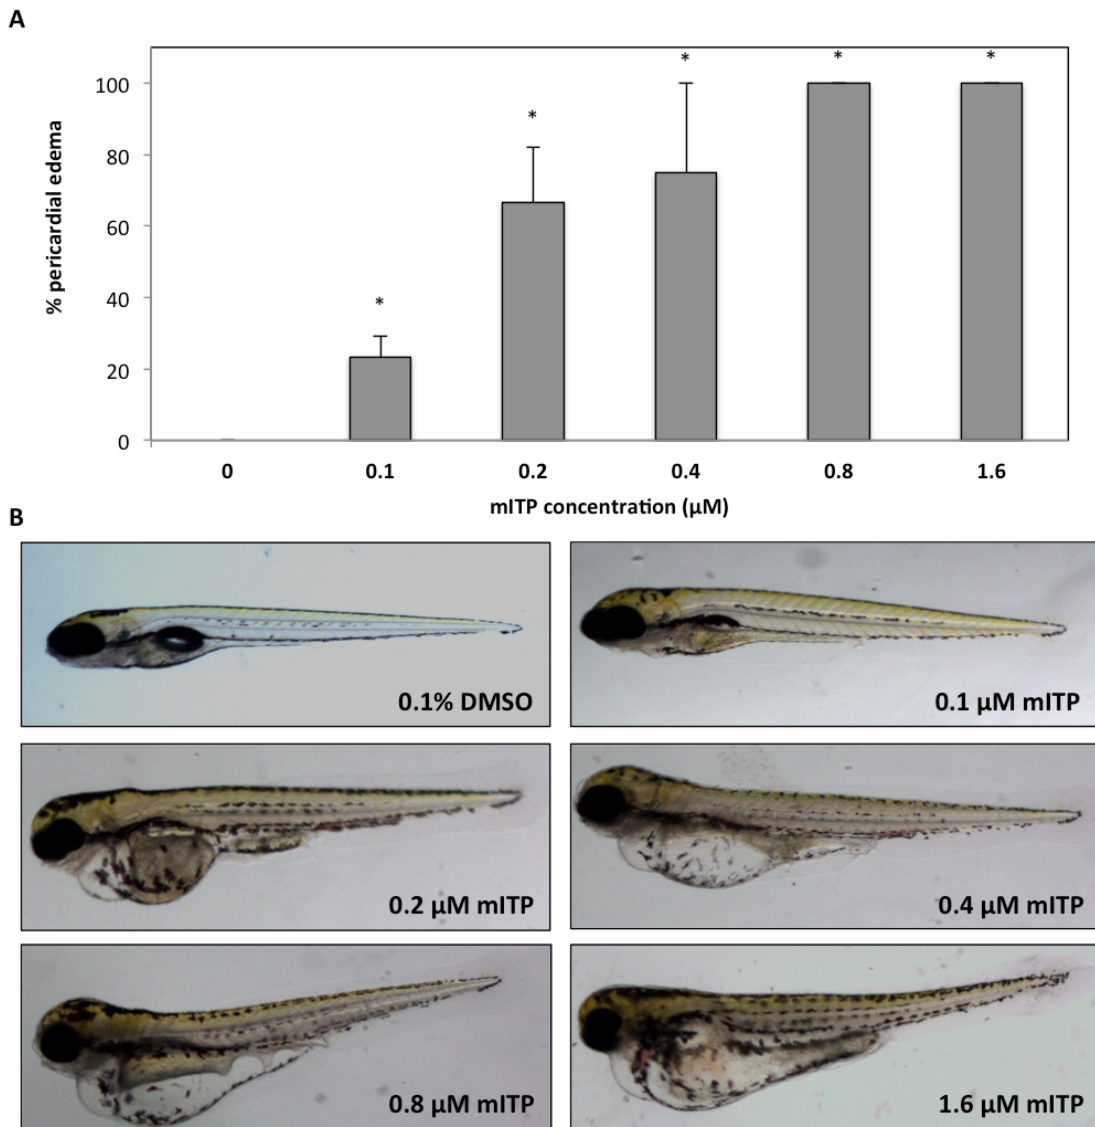

**Supplemental Figure S2.** Co-exposure with CH223191 mitigates mITP-induced cardiotoxicity. (A) Representative bright-field images and (B) percent PE of 120-hpf zebrafish exposed to vehicle (0.1% DMSO) and 0.2  $\mu$ M mITP in the absence or presence of 0.5  $\mu$ M CH223191. Percent PE is mean  $\pm$  SE. (C) CYP1A mRNA induction normalized to  $\beta$ -actin (internal control) at 72 hpf. Fold increase is mean  $\pm$  SE. Dagger ( $\dagger$ ) denotes a statistically significant increase in treatment groups relative to vehicle controls ( $p < 0.05$ ), whereas double-dagger ( $\ddagger$ ) denotes a statistically significant decrease relative to mITP alone ( $p < 0.05$ ). N = 3 replicate vials and 9 to 10 fish per replicate.

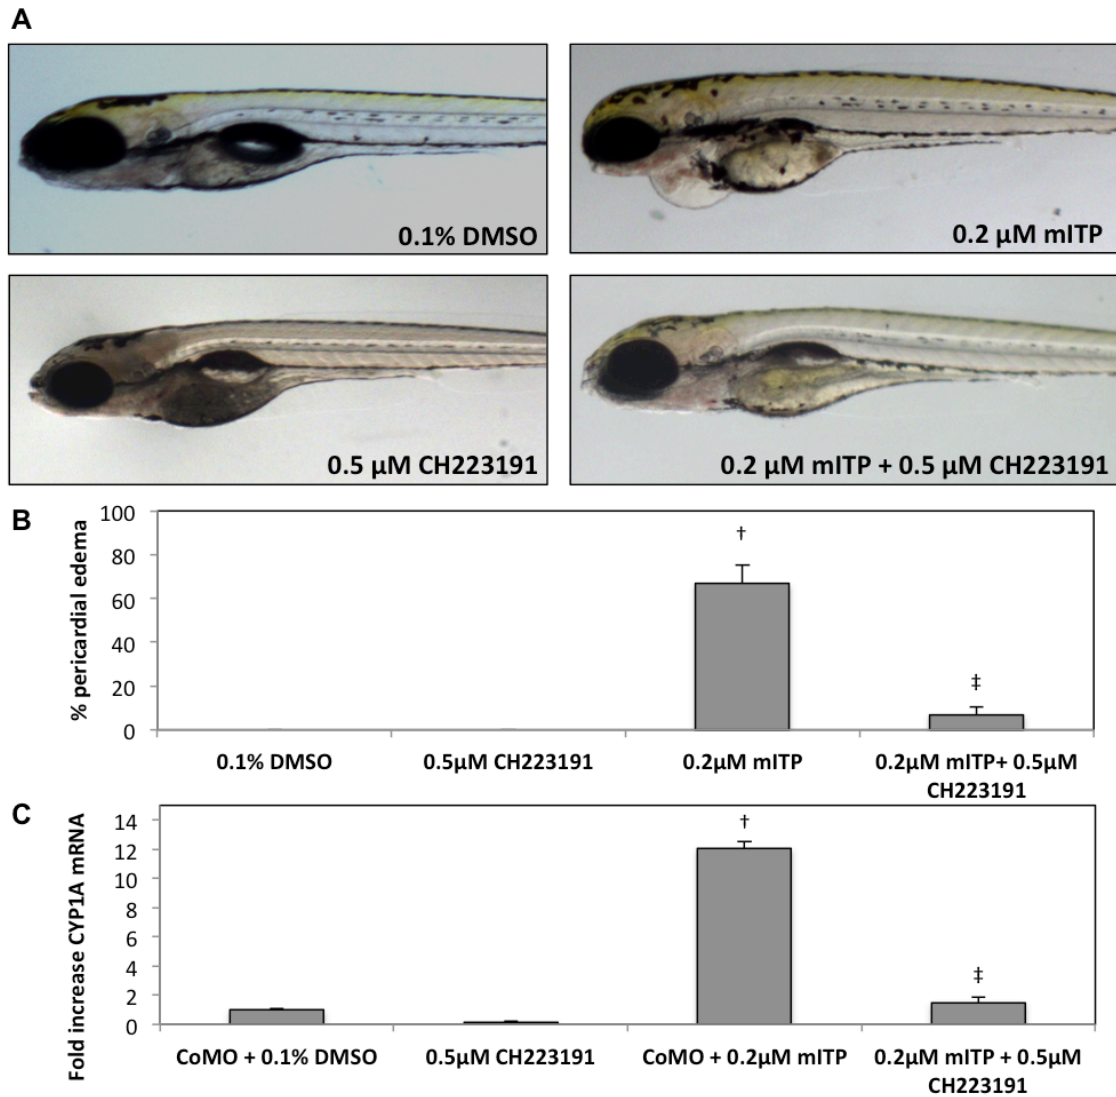

Supplement: NIHMS599057-supplement-01.pdf [file NIHMS599057-supplement-01.pdf]
